# Supplementary material for: Development of Bioinspired Functional Chitosan/Cellulose Nanofiber 3D Hydrogel Constructs by 3D Printing for Application in the Engineering of Mechanically Demanding Tissues
Source: MDPI journal article supplement (doi:10.3390/polym13101663), 2021-05-20
Supplement: s1 [file s1]

# Supporting Information

## Development of Bioinspired Functional Chitosan/Cellulose Nanofiber 3D Hydrogel Constructs by 3D Printing for Application in the Engineering of Mechanically Demanding Tissues

Arnaud Kamdem Tamo<sup>1,2,3</sup>, Ingo Doench<sup>1,2,3</sup>, Lukas Walter<sup>1,2,3</sup>, Alexandra Montembault<sup>4</sup>, Guillaume Sudre<sup>4</sup>, Laurent David<sup>4</sup>, Aliuska Morales-Helguera<sup>5</sup>, Mischa Selig<sup>6</sup>, Bernd Rolauffs<sup>6</sup>, Anke Bernstein<sup>6</sup>, Daniel Hoenders<sup>7</sup>, Andreas Walther<sup>7</sup>, Anayancy Osorio-Madrazo<sup>1,2,3,\*</sup>

<sup>1</sup> Institute of Microsystems Engineering IMTEK, Laboratory for Sensors, University of Freiburg, 79110 Freiburg, Germany; arnaud.kamdem@imtek.uni-freiburg.de (A.K.T.); ingo.doench@imtek.uni-freiburg.de (I.D.); lukas.walter@imtek.uni-freiburg.de (L.W.)

<sup>2</sup> Freiburg Materials Research Center—FMF, University of Freiburg, 79104 Freiburg, Germany

<sup>3</sup> Freiburg Center for Interactive Materials and Bioinspired Technologies—FIT, University of Freiburg, 79110 Freiburg, Germany

<sup>4</sup> Ingénierie des Matériaux Polymères IMP UMR 5223—CNRS, Université Claude Bernard Lyon 1, Université de Lyon, 69622 Villeurbanne Cedex, France; alexandra.clayer-montembault@univ-lyon1.fr (A.M.); guillaume.sudre@univ-lyon1.fr (G.S.); laurent.david@univ-lyon1.fr (L.D.)

<sup>5</sup> Chemical Bioactive Center CBQ, Molecular Simulation and Drug Design Group, Central University of Las Villas, 50400 Santa Clara, Cuba; aliuska@uclv.edu.cu

<sup>6</sup> Center for Tissue Replacement, Regeneration & Neogenesis—G.E.R.N., Department of Orthopedics and Trauma Surgery, University of Freiburg, 79108 Freiburg, Germany; mischa.selig91@gmail.com (M.S.); berndrolauffs@googlegmail.com (B.R.); anke.bernstein@uniklinik-freiburg.de (A.B.)

<sup>7</sup> Department of Chemistry, University Mainz, 55128 Mainz, Germany; daniel.hoenders@uni-mainz.de (D.H.); andreas.walther@uni-mainz.de (A.W.)

\* Correspondence: anayancy.osorio@imtek.uni-freiburg.de; Tel.: +49-761-203-67363

**Keywords:** hydrogel 3D printing; polymer composites; chitosan; cellulose nanofibers; X-ray synchrotron scattering; micromechanics; tissue engineering

### 1. Orientation of Cellulose Nanofibers. Hermans' Orientation Factor and Affine Model

The affine model, for reorientation of rigid rod-like crystals,[1, 2] was used to obtain the orientation distribution function. Figure S1 shows the fit with Lorentz function of the curve of azimuthal intensity around the (200)<sub>h</sub> diffraction ring of Cellulose I allomorph crystals of the cellulose nanofibers (CNFs) vs. azimuthal angle  $\phi$ , after evaluating the 2D WAXS patterns obtained for the CHI/CNF printed hydrogel filaments in situ at the synchrotron beamline, at different strain values during stretching (Figure 6b).

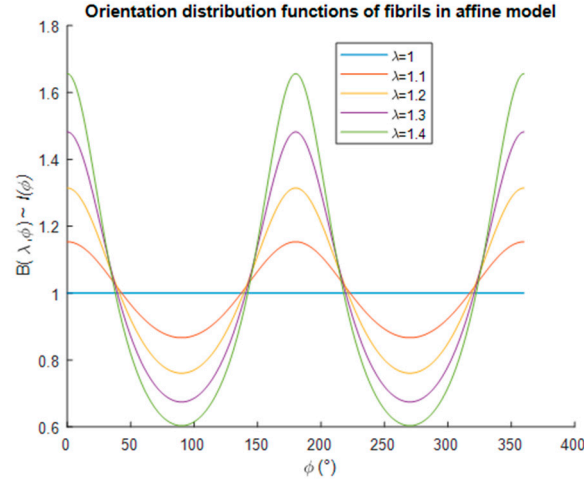

**Figure S1.** Azimuthal intensity around the diffraction signal (200)<sub>I</sub> of Cellulose I crystals constituting the cellulose nanofibers (CNFs) vs. azimuthal angle  $\phi$  (Affine model, [1, 2]).

The Hermans' orientation factor is defined as follows (Equation (S1)):

$$f_H = \frac{3\langle \cos^2 \phi \rangle - 1}{2} \quad (S1)$$

where  $\langle \cos^2 \phi \rangle$  is the average cosine squared value for the (200)<sub>I</sub> diffraction ring. This latter is calculated using the Equation (S2):

$$\langle \cos^2 \phi \rangle = \frac{\sum_{i=0}^{90} I_i \cos^2 \phi_i \sin \phi_i}{\sum_{i=0}^{90} I_i \sin \phi_i} \quad (S2)$$

In the manuscript Figure 6b (Right) the obtained Hermans orientation factor for the stretching of the hydrogel filament CHI3/CNF0.4 are shown, which  $f_H$  values evolved from 0.002 to -0.110 when stretching till strain 24%, confirming the alignment of the CNFs to yield anisotropic hydrogel composites by stretching.

## 2. Optimization for High Size Resolution and Mechanical Performance of Printed CHI/CNF Hydrogels

**Table S1.** ANOVA analysis for printed hydrogel filament diameter.

| Factor                                   | ANOVA; R-sqr=.99998; Adj.:.99992 |                   |             |          |         |
|------------------------------------------|----------------------------------|-------------------|-------------|----------|---------|
|                                          | Sum of Square                    | Degree of Freedom | Mean Square | F-value  | p       |
| (1) c(CHI)                               | 8.33                             | 1                 | 8.33        | 20.39    | 0.046   |
| (2) c(CNF)                               | 1123.63                          | 1                 | 1123.63     | 2751.05  | < 0.001 |
| (3) Extrusion needle inner diameter (ID) | 35892.72                         | 1                 | 35892.72    | 87878.41 | < 0.001 |
| 1 by 3                                   | 174.01                           | 1                 | 174.01      | 426.04   | 0.002   |
| 2 by 3                                   | 37.80                            | 1                 | 37.80       | 92.56    | 0.012   |
| Error                                    | 0.82                             | 2                 | 0.41        |          |         |
| Total SS                                 | 37237.31                         | 7                 |             |          |         |

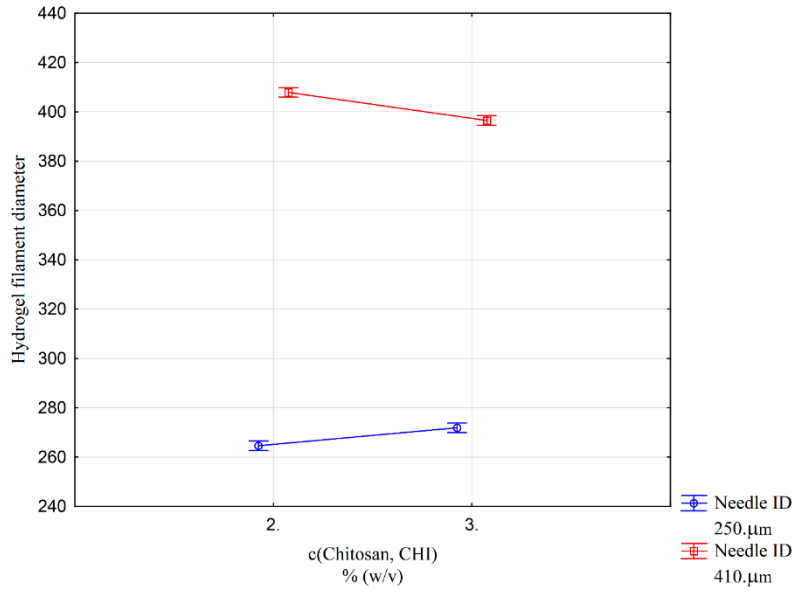

**Figure S2.** Effect of the interaction between c(CHI) and needle ID on the hydrogel filament diameter.

**Table S2.** ANOVA analysis for Young's modulus E of printed hydrogel filament.

| Factor                                   | ANOVA; R-sqr=.96862; Adj.:.94508 |                   |             |            |         |
|------------------------------------------|----------------------------------|-------------------|-------------|------------|---------|
|                                          | Sum of Square                    | Degree of Freedom | Mean Square | F-value    | p       |
| (1) c(CHI)                               | 3.1878125                        | 1                 | 3.1878125   | 85.7226891 | < 0.001 |
| (2) c(CNF)                               | 0.8778125                        | 1                 | 0.8778125   | 23.605042  | 0.008   |
| (3) Extrusion needle inner diameter (ID) | 0.5253125                        | 1                 | 0.5253125   | 14.1260504 | 0.020   |
| Error                                    | 0.14875                          | 4                 | 0.0371875   |            |         |
| Total SS                                 | 4.7396875                        | 7                 |             |            |         |

**Table S3.** ANOVA analysis for stress at break of printed hydrogel filament.

| Factor                                   | ANOVA; R-sqr=.97112; Adj.:.94946 |                   |             |          |       |
|------------------------------------------|----------------------------------|-------------------|-------------|----------|-------|
|                                          | Sum of Square                    | Degree of Freedom | Mean Square | F-value  | p     |
| (1) c(CHI)                               | 0.500000                         | 1                 | 0.500000    | 73.26007 | 0.001 |
| (2) c(CNF)                               | 0.180000                         | 1                 | 0.180000    | 26.37363 | 0.007 |
| (3) Extrusion needle inner diameter (ID) | 0.238050                         | 1                 | 0.238050    | 34.87912 | 0.004 |
| Error                                    | 0.027300                         | 4                 | 0.006825    |          |       |
| Total SS                                 | 0.945350                         | 7                 |             |          |       |

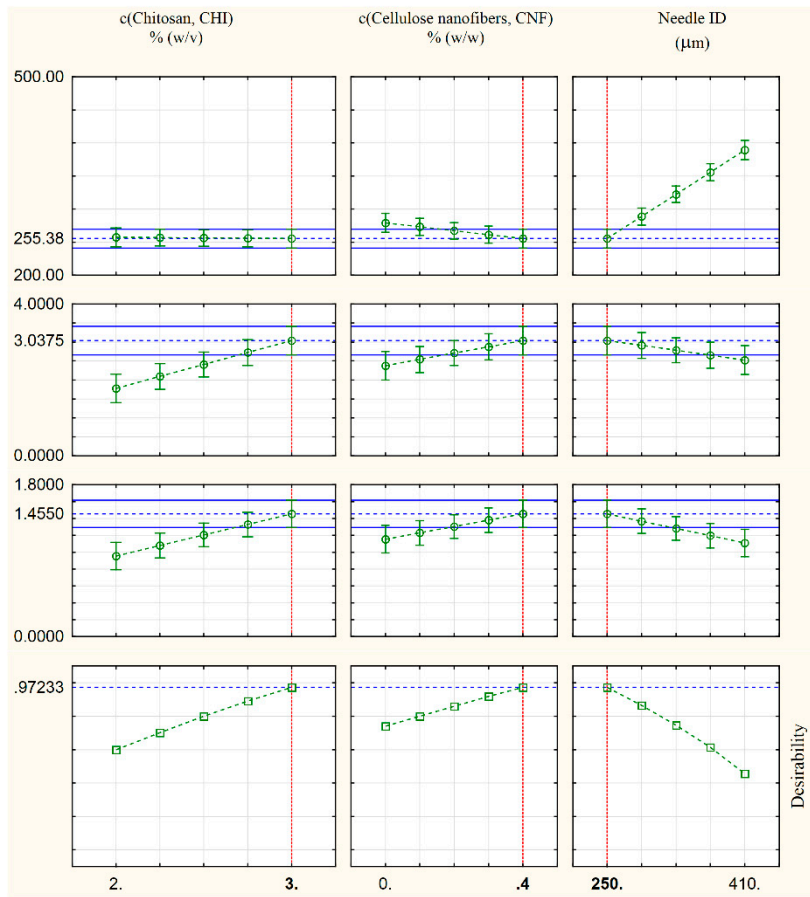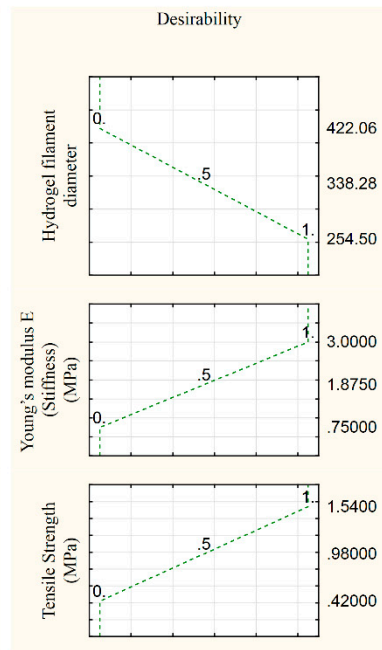

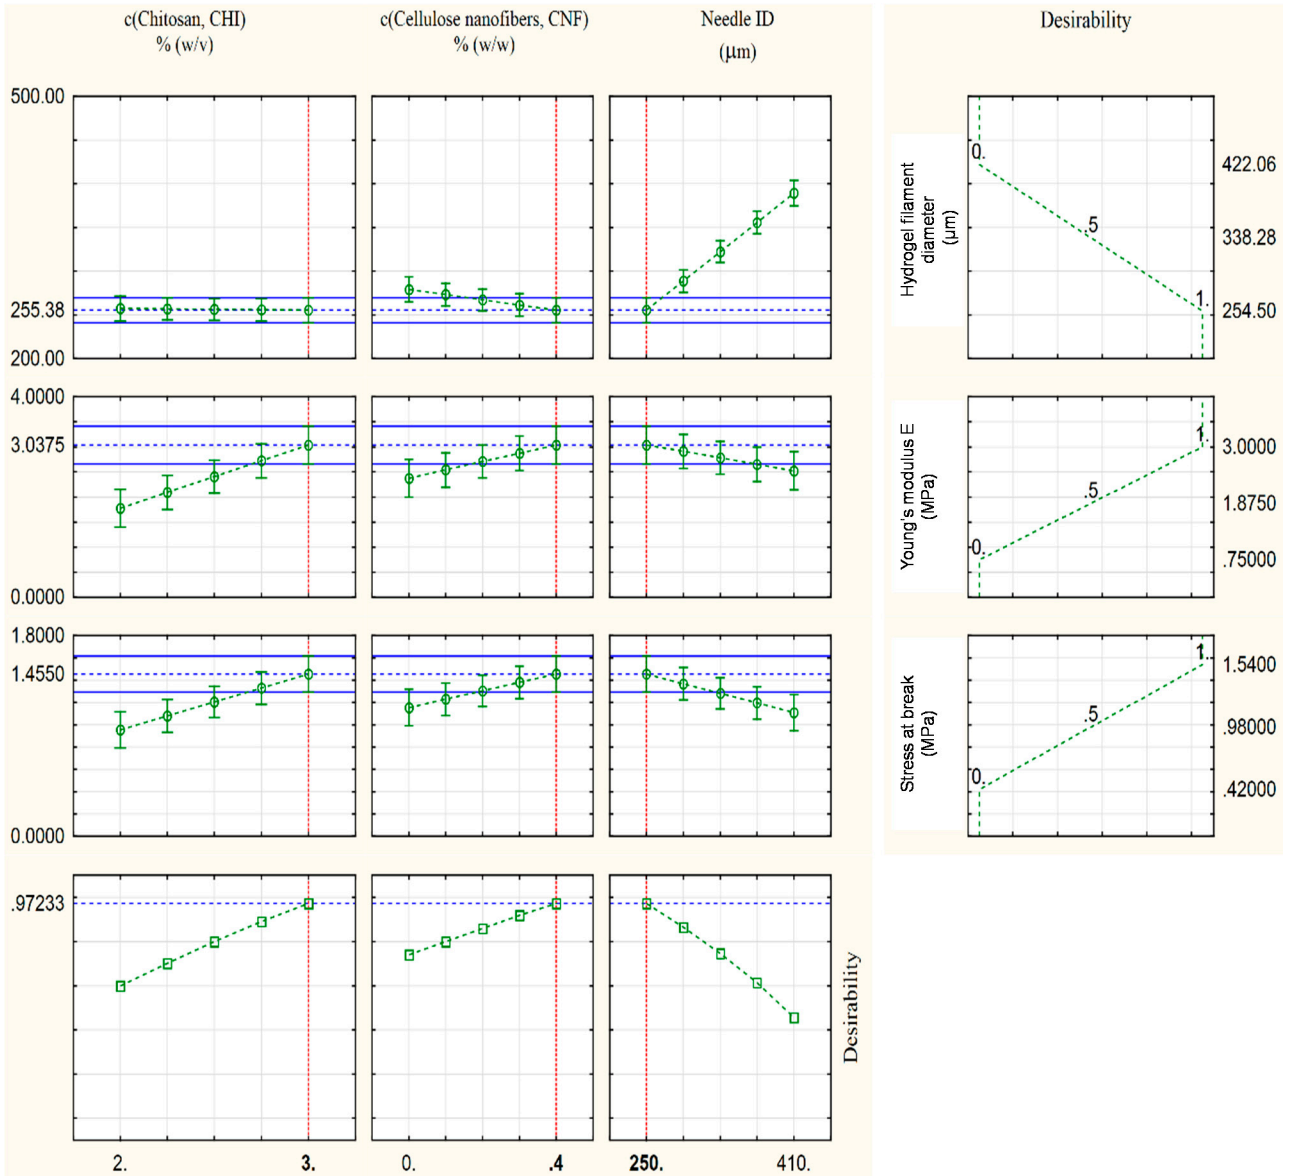

**Figure S3.** Profiles of predicted values and desirability.

### 3. Statistical analysis of LIVE and DEAD cells counting obtained from cell viability assays

Number of LIVE cells, and ratio of LIVE to DEAD cells (  $n(\text{LIVE}) : n(\text{DEAD})$  ) obtained in the culture of NIH/3T3 fibroblast in the hydrogel scaffolds (CHI2; CHI2/CNF0.4; CHI3) at Days 1, 3, and 6, were statistically analyzed. One-way Analysis of Variance (ANOVA) was performed using the software STATISTICA 10.0 (StatSoft Inc: Tulsa, USA, 2011), followed by the Tukey's HSD *post hoc* test if significant differences were found ( $p < 0.05$ ) in ANOVA, as follows:

#### Analysis of Number of LIVE Cells :

1) For each formulation (CHI2, CHI2/CNF04 or CHI3), comparison at the different Days (1.00, 3.00, 6.00):

| ANOVA           |                |                |    |             |        |      |
|-----------------|----------------|----------------|----|-------------|--------|------|
|                 |                | Sum of Squares | df | Mean Square | F      | Sig. |
| LIVE_CHI2       | Between Groups | 3255555.185    | 2  | 1627777.592 | 17.988 | .001 |
|                 | Within Groups  | 814434.421     | 9  | 90492.713   |        |      |
|                 | Total          | 4069989.606    | 11 |             |        |      |
| LIVE_CHI2/CNF04 | Between Groups | 4097595.547    | 2  | 2048797.773 | 13.493 | .002 |

|           |                |             |    |            |        |      |
|-----------|----------------|-------------|----|------------|--------|------|
|           | Within Groups  | 1366546.008 | 9  | 151838.445 |        |      |
|           | Total          | 5464141.555 | 11 |            |        |      |
| LIVE_CHI3 | Between Groups | 11924.622   | 2  | 5962.311   | 14.567 | .002 |
|           | Within Groups  | 3683.602    | 9  | 409.289    |        |      |
|           | Total          | 15608.225   | 11 |            |        |      |

### Multiple Comparisons

Tukey HSD

| Dependent Variable | (I) Day | (J) Day | Mean Difference<br>(I-J) | Std. Error | Sig. | 95% Confidence Interval |             |
|--------------------|---------|---------|--------------------------|------------|------|-------------------------|-------------|
|                    |         |         |                          |            |      | Lower Bound             | Upper Bound |
| LIVE_CHI2          | 1.00    | 3.00    | -1262.15697*             | 212.71191  | .001 | -1856.0498              | -668.2641   |
|                    |         | 6.00    | -469.66895               | 212.71191  | .123 | -1063.5618              | 124.2239    |
|                    | 3.00    | 1.00    | 1262.15697*              | 212.71191  | .001 | 668.2641                | 1856.0498   |
|                    |         | 6.00    | 792.48801*               | 212.71191  | .012 | 198.5952                | 1386.3809   |
|                    | 6.00    | 1.00    | 469.66895                | 212.71191  | .123 | -124.2239               | 1063.5618   |
|                    |         | 3.00    | -792.48801*              | 212.71191  | .012 | -1386.3809              | -198.5952   |
| LIVE_CHI2/CNF04    | 1.00    | 3.00    | -1023.09180*             | 275.53443  | .012 | -1792.3855              | -253.7981   |
|                    |         | 6.00    | -1378.47191*             | 275.53443  | .002 | -2147.7656              | -609.1782   |
|                    | 3.00    | 1.00    | 1023.09180*              | 275.53443  | .012 | 253.7981                | 1792.3855   |
|                    |         | 6.00    | -355.38010               | 275.53443  | .435 | -1124.6738              | 413.9136    |
|                    | 6.00    | 1.00    | 1378.47191*              | 275.53443  | .002 | 609.1782                | 2147.7656   |
|                    |         | 3.00    | 355.38010                | 275.53443  | .435 | -413.9136               | 1124.6738   |
| LIVE_CHI3          | 1.00    | 3.00    | 77.21431*                | 14.30540   | .001 | 37.2735                 | 117.1551    |
|                    |         | 6.00    | 38.16368                 | 14.30540   | .061 | -1.7771                 | 78.1044     |
|                    | 3.00    | 1.00    | -77.21431*               | 14.30540   | .001 | -117.1551               | -37.2735    |
|                    |         | 6.00    | -39.05063                | 14.30540   | .055 | -78.9914                | .8901       |
|                    | 6.00    | 1.00    | -38.16368                | 14.30540   | .061 | -78.1044                | 1.7771      |
|                    |         | 3.00    | 39.05063                 | 14.30540   | .055 | -.8901                  | 78.9914     |

\* The mean difference is significant at the 0.05 level.

2) For each Day (1.00, 3.00 or 6.00), comparison between the different formulations (CHI2, CHI2/CNF0.4 and CHI3):

### ANOVA

|           |                | Sum of Squares | df | Mean Square | F      | Sig. |
|-----------|----------------|----------------|----|-------------|--------|------|
| LIVE_DIA1 | Between Groups | 18772.620      | 2  | 9386.310    | 3.388  | .080 |
|           | Within Groups  | 24931.970      | 9  | 2770.219    |        |      |
|           | Total          | 43704.590      | 11 |             |        |      |
| LIVE_DIA3 | Between Groups | 4477572.688    | 2  | 2238786.344 | 17.066 | .001 |
|           | Within Groups  | 1180636.665    | 9  | 131181.852  |        |      |
|           | Total          | 5658209.354    | 11 |             |        |      |
| LIVE_6    | Between Groups | 4080830.179    | 2  | 2040415.089 | 18.756 | .001 |

|               |             |    |            |  |  |
|---------------|-------------|----|------------|--|--|
| Within Groups | 979095.397  | 9  | 108788.377 |  |  |
| Total         | 5059925.575 | 11 |            |  |  |

### Multiple Comparisons

Tukey HSD

| Dependent Variable | (I) Formulacion | (J) Formulacion | Mean Difference (I-J) | Std. Error | Sig. | 95% Confidence Interval |             |
|--------------------|-----------------|-----------------|-----------------------|------------|------|-------------------------|-------------|
|                    |                 |                 |                       |            |      | Lower Bound             | Upper Bound |
| LIVE_DIA1          | CHI2(Y)         | CHI2CNF04       | 81.05974              | 37.21706   | .129 | -22.8505                | 184.9700    |
|                    |                 | CHI3            | 86.48334              | 37.21706   | .103 | -17.4269                | 190.3936    |
|                    | CHI2CNF04       | CHI2(Y)         | -81.05974             | 37.21706   | .129 | -184.9700               | 22.8505     |
|                    |                 | CHI3            | 5.42360               | 37.21706   | .988 | -98.4866                | 109.3338    |
|                    | CHI3            | CHI2(Y)         | -86.48334             | 37.21706   | .103 | -190.3936               | 17.4269     |
|                    |                 | CHI2CNF04       | -5.42360              | 37.21706   | .988 | -109.3338               | 98.4866     |
| LIVE_DIA3          | CHI2(Y)         | CHI2CNF04       | 320.12490             | 256.10725  | .456 | -394.9280               | 1035.1778   |
|                    |                 | CHI3            | 1425.85461*           | 256.10725  | .001 | 710.8017                | 2140.9075   |
|                    | CHI2CNF04       | CHI2(Y)         | -320.12490            | 256.10725  | .456 | -1035.1778              | 394.9280    |
|                    |                 | CHI3            | 1105.72971*           | 256.10725  | .005 | 390.6768                | 1820.7826   |
|                    | CHI3            | CHI2(Y)         | -1425.85461*          | 256.10725  | .001 | -2140.9075              | -710.8017   |
|                    |                 | CHI2CNF04       | -1105.72971*          | 256.10725  | .005 | -1820.7826              | -390.6768   |
| LIVE_6             | CHI2(Y)         | CHI2CNF04       | -827.74321*           | 233.22562  | .015 | -1478.9104              | -176.5760   |
|                    |                 | CHI3            | 594.31597             | 233.22562  | .073 | -56.8513                | 1245.4832   |
|                    | CHI2CNF04       | CHI2(Y)         | 827.74321*            | 233.22562  | .015 | 176.5760                | 1478.9104   |
|                    |                 | CHI3            | 1422.05919*           | 233.22562  | .000 | 770.8920                | 2073.2264   |
|                    | CHI3            | CHI2(Y)         | -594.31597            | 233.22562  | .073 | -1245.4832              | 56.8513     |
|                    |                 | CHI2CNF04       | -1422.05919*          | 233.22562  | .000 | -2073.2264              | -770.8920   |

\* The mean difference is significant at the 0.05 level.

### Analysis of LIVE to DEAD cells ratio $n(\text{LIVE}):n(\text{DEAD})$ :

For each formulation (CHI2, CHI2/CNF04 or CHI3), comparison at the different Days (1.00, 3.00, 6.00):

### ANOVA

|           |                | Sum of Squares | df | Mean Square | F      | Sig. |
|-----------|----------------|----------------|----|-------------|--------|------|
| CHI2      | Between Groups | 201.699        | 2  | 100.850     | 77.121 | .000 |
|           | Within Groups  | 11.769         | 9  | 1.308       |        |      |
|           | Total          | 213.468        | 11 |             |        |      |
| CHI2CNF04 | Between Groups | 4.315          | 2  | 2.158       | 4.090  | .055 |
|           | Within Groups  | 4.748          | 9  | .528        |        |      |
|           | Total          | 9.063          | 11 |             |        |      |
| CHI3      | Between Groups | 6.108          | 2  | 3.054       | 58.993 | .000 |
|           | Within Groups  | .466           | 9  | .052        |        |      |

|       |       |    |  |  |  |
|-------|-------|----|--|--|--|
| Total | 6.574 | 11 |  |  |  |
|-------|-------|----|--|--|--|

### Multiple Comparisons

Tukey HSD

| Dependent Variable (I) Dia136 (J) Dia136 |      |      | Mean Difference (I-J) | Std. Error | Sig. | 95% Confidence Interval |             |
|------------------------------------------|------|------|-----------------------|------------|------|-------------------------|-------------|
|                                          |      |      |                       |            |      | Lower Bound             | Upper Bound |
| CHI2                                     | 1.00 | 3.00 | 8.83086*              | .80860     | .000 | 6.5732                  | 11.0885     |
|                                          |      | 6.00 | 8.55658*              | .80860     | .000 | 6.2990                  | 10.8142     |
|                                          | 3.00 | 1.00 | -8.83086*             | .80860     | .000 | -11.0885                | -6.5732     |
|                                          |      | 6.00 | -.27428               | .80860     | .939 | -2.5319                 | 1.9833      |
|                                          | 6.00 | 1.00 | -8.55658*             | .80860     | .000 | -10.8142                | -6.2990     |
|                                          |      | 3.00 | .27428                | .80860     | .939 | -1.9833                 | 2.5319      |
| CHI2CNF04                                | 1.00 | 3.00 | 1.34825               | .51359     | .065 | -.0857                  | 2.7822      |
|                                          |      | 6.00 | .16936                | .51359     | .942 | -1.2646                 | 1.6033      |
|                                          | 3.00 | 1.00 | -1.34825              | .51359     | .065 | -2.7822                 | .0857       |
|                                          |      | 6.00 | -1.17889              | .51359     | .108 | -2.6128                 | .2551       |
|                                          | 6.00 | 1.00 | -.16936               | .51359     | .942 | -1.6033                 | 1.2646      |
|                                          |      | 3.00 | 1.17889               | .51359     | .108 | -.2551                  | 2.6128      |
| CHI3                                     | 1.00 | 3.00 | .99327*               | .16088     | .000 | .5441                   | 1.4425      |
|                                          |      | 6.00 | 1.74182*              | .16088     | .000 | 1.2926                  | 2.1910      |
|                                          | 3.00 | 1.00 | -.99327*              | .16088     | .000 | -1.4425                 | -.5441      |
|                                          |      | 6.00 | .74856*               | .16088     | .003 | .2994                   | 1.1977      |
|                                          | 6.00 | 1.00 | -1.74182*             | .16088     | .000 | -2.1910                 | -1.2926     |
|                                          |      | 3.00 | -.74856*              | .16088     | .003 | -1.1977                 | -.2994      |

\* The mean difference is significant at the 0.05 level.

For each Day (1.00, 3.00 or 6.00), comparison between the different formulations (CHI2, CHI2/CNF0.4 and CHI3):

### ANOVA

|       |                | Sum of Squares | df | Mean Square | F      | Sig. |
|-------|----------------|----------------|----|-------------|--------|------|
| Dia_1 | Between Groups | 139.231        | 2  | 69.616      | 46.714 | .000 |
|       | Within Groups  | 13.412         | 9  | 1.490       |        |      |
|       | Total          | 152.644        | 11 |             |        |      |
| Dia_3 | Between Groups | 3.433          | 2  | 1.717       | 14.838 | .001 |
|       | Within Groups  | 1.041          | 9  | .116        |        |      |
|       | Total          | 4.474          | 11 |             |        |      |
| Dia_6 | Between Groups | 19.524         | 2  | 9.762       | 34.735 | .000 |
|       | Within Groups  | 2.529          | 9  | .281        |        |      |
|       | Total          | 22.053         | 11 |             |        |      |

## Multiple Comparisons

Tukey HSD

| Dependent Variable | (I) Formu | (J) Formu | Mean Difference (I-J) | Std. Error | Sig. | 95% Confidence Interval |             |
|--------------------|-----------|-----------|-----------------------|------------|------|-------------------------|-------------|
|                    |           |           |                       |            |      | Lower Bound             | Upper Bound |
| Dia_1              | CHI2(Y)   | CHI2CNF04 | 6.35827*              | .86321     | .000 | 3.9482                  | 8.7684      |
|                    |           | CHI3      | 7.85793*              | .86321     | .000 | 5.4478                  | 10.2680     |
|                    | CHI2CNF04 | CHI2(Y)   | -6.35827*             | .86321     | .000 | -8.7684                 | -3.9482     |
|                    |           | CHI3      | 1.49966               | .86321     | .244 | -.9104                  | 3.9098      |
|                    | CHI3      | CHI2(Y)   | -7.85793*             | .86321     | .000 | -10.2680                | -5.4478     |
|                    |           | CHI2CNF04 | -1.49966              | .86321     | .244 | -3.9098                 | .9104       |
| Dia_3              | CHI2(Y)   | CHI2CNF04 | -1.12434*             | .24051     | .003 | -1.7958                 | -.4528      |
|                    |           | CHI3      | .02034                | .24051     | .996 | -.6512                  | .6918       |
|                    | CHI2CNF04 | CHI2(Y)   | 1.12434*              | .24051     | .003 | .4528                   | 1.7958      |
|                    |           | CHI3      | 1.14468*              | .24051     | .003 | .4732                   | 1.8162      |
|                    | CHI3      | CHI2(Y)   | -.02034               | .24051     | .996 | -.6918                  | .6512       |
|                    |           | CHI2CNF04 | -1.14468*             | .24051     | .003 | -1.8162                 | -.4732      |
| Dia_6              | CHI2(Y)   | CHI2CNF04 | -2.02895*             | .37486     | .001 | -3.0756                 | -.9823      |
|                    |           | CHI3      | 1.04318               | .37486     | .051 | -.0034                  | 2.0898      |
|                    | CHI2CNF04 | CHI2(Y)   | 2.02895*              | .37486     | .001 | .9823                   | 3.0756      |
|                    |           | CHI3      | 3.07213*              | .37486     | .000 | 2.0255                  | 4.1187      |
|                    | CHI3      | CHI2(Y)   | -1.04318              | .37486     | .051 | -2.0898                 | .0034       |
|                    |           | CHI2CNF04 | -3.07213*             | .37486     | .000 | -4.1187                 | -2.0255     |

\* The mean difference is significant at the 0.05 level.

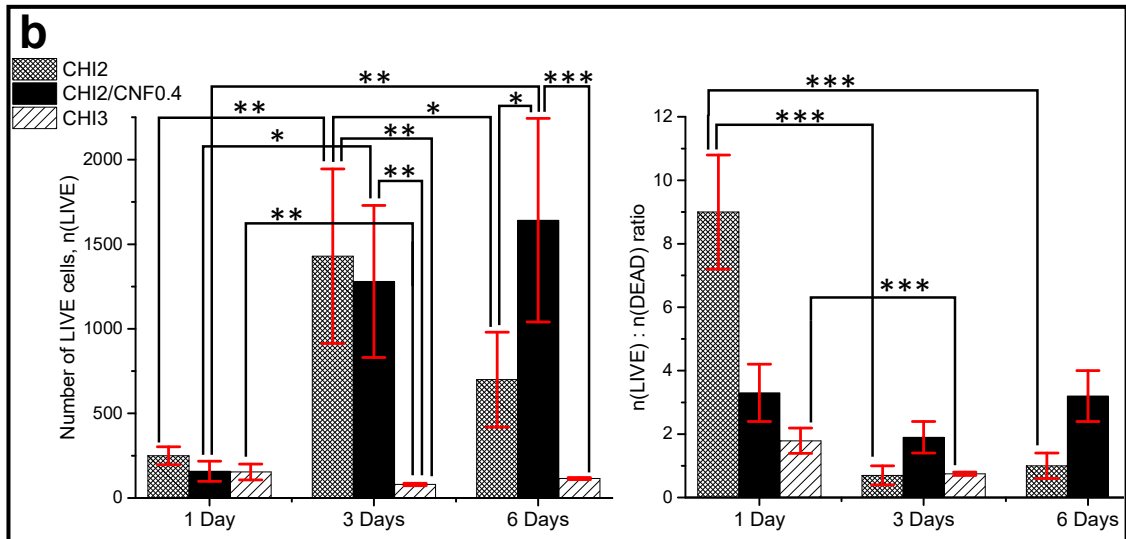

**Figure 9b of Manuscript.** (Left) Number of LIVE cells n(LIVE) (Left), (Right) n(LIVE)/n(DEAD) cell ratio obtained for the different CHI/CNF formulations at the different Days, expressed as means  $\pm$  SDs, n=4 (\*p < .05, \*\*p < .01, \*\*\*p < .001).

## Funding Sources

This research was supported by the Emmy Noether Programme of the German Research Foundation DFG (Grant number: OS 497/6-1).

## References

1. Crawford, S.M.; Kolsky, H. Stress Birefringence in Polyethylene, *Proceedings of the Physical Society. Section B* 64(2) (1951) 119-125.
2. Boote, C.; Sturrock, E.J.; Attenburrow, G.E.; Meek, K.M. Psuedo-affine behaviour of collagen fibres during the uniaxial deformation of leather, *Journal of Materials Science* **2002**, 37, 3651-3656.
